# Supplementary material
Source: PubMed Central journal article supplement (PMC8085767)
Supplement: jama-e215775-s001.pdf [file jama-e215775-s001.pdf]

## Supplemental Online Content

Norman M, Navér L, Söderling J, et al. Association of maternal SARS-CoV-2 infection in pregnancy with neonatal outcomes. *JAMA*. Published online April 29, 2021. doi:10.1001/jama.2021.5775

**eTable 1.** ICD-10 Codes Used for Outcomes Not Defined in Text and Exclusion Criteria

**eTable 2.** Characteristics of Live Born Infants Experiencing In-Hospital Neonatal Mortality (n=7, Infants Delivered by Mothers Testing Positive for SARS-CoV-2 in Pregnancy Only)

**eTable 3.** Mediation Analysis for Maternal SARS-CoV-2 Test-Status in Pregnancy and the Risk of Any Neonatal Respiratory Disease

**eTable 4.** Characteristics of Infants Born in Sweden (March 11, 2020 – Jan 31, 2021) and Testing Positive for SARS-CoV-2 in the Neonatal Period (0-28 Days After Birth)

**eTable 5.** Neonatal Outcomes of Infants Born in Sweden (March 11, 2020 – Jan 31, 2021) by SARS-CoV-2 Test-Status of Mother in Pregnancy, Restricting the Exposure Window for Test-Positivity Among Pregnant Women From Conception to Delivery

This supplemental material has been provided by the authors to give readers additional information about their work.

**eTable 1.** ICD-10 Codes Used for Outcomes Not Defined in Text and Exclusion Criteria

| Outcome/Exclusion                                                                          | ICD-10                                   |
|--------------------------------------------------------------------------------------------|------------------------------------------|
| <b>Outcomes</b><br>SARS-CoV-2 positive<br>Virus identified on PCR                          | U07.1                                    |
| <b>Neurologic disorders</b><br>Hypoxic-ischemic encephalopathy 2-3<br>Neonatal convulsions | P91.6B, P91.6C<br>P90.9A, P90.9B, P90.9C |
| <b>Respiratory complications</b><br>Meconium aspiration<br>Congenital pneumonia            | P24.0<br>P23                             |
| <b>Circulatory problems</b><br>Patent ductus arteriosus                                    | Q25.0                                    |
| <b>Exclusion criteria</b><br>Birth defect                                                  | Q00-Q24, Q25.1-Q25.9, Q26.0-Q99          |

**eTable 2.** Characteristics of Live Born Infants Experiencing In-Hospital Neonatal Mortality (n=7, Infants Delivered by Mothers Testing Positive for SARS-CoV-2 in Pregnancy Only)

|          | SARS-CoV-2 test-positivity in mother, days before delivery | Mother admitted for intensive care | Infant test-positive for SARS-CoV-2 | Mode of delivery          | Gestational age, weeks | Apgar scores at 1, 5 and 10 min | Survival in days | Neonatal diagnoses reported to the Swedish Neonatal Quality Register                                     |
|----------|------------------------------------------------------------|------------------------------------|-------------------------------------|---------------------------|------------------------|---------------------------------|------------------|----------------------------------------------------------------------------------------------------------|
| Infant 1 | 3                                                          | No                                 | No                                  | Vaginal, non-instrumental | 22                     | 5, 8, 8                         | 9                | Extremely preterm birth, RDS, intraventricular hemorrhage, gut perforation                               |
| Infant 2 | 18                                                         | No                                 | No                                  | Emergency C-section       | 39                     | 1, 1, 1                         | 9                | Severe birth asphyxia, hypoxic-ischemic encephalopathy, persistent pulmonary hypertension                |
| Infant 3 | -7                                                         | No                                 | No                                  | Emergency C-section       | 28                     | 1, 3, 5                         | 3                | Very preterm birth, asphyxia, persistent pulmonary hypertension, pneumothorax                            |
| Infant 4 | 65                                                         | No                                 | No                                  | Vaginal, non-instrumental | 26                     | missing, missing, 6             | 11               | Extremely preterm birth, group B streptococcal septicemia, intraventricular and intracerebral hemorrhage |
| Infant 5 | 41                                                         | No                                 | No                                  | Emergency C-section       | 34                     | 5, 6, 9                         | 7                | Mitochondrial myopathy, respiratory insufficiency, severe hypoxic-ischemic encephalopathy                |
| Infant 6 | 74                                                         | No                                 | No                                  | Emergency C-section       | 39                     | 1, 2, 7                         | 7                | Birth asphyxia, severe hypoxic-ischemic encephalopathy                                                   |
| Infant 7 | 70                                                         | No                                 | No                                  | Vaginal, non-instrumental | 22                     | 3, 4, 8                         | 3                | Extremely preterm birth, RDS, bilateral intraventricular hemorrhages grade 4                             |

**eTable 3.** Mediation Analysis for Maternal SARS-CoV-2 Test-Status in Pregnancy and the Risk of Any Neonatal Respiratory Disease\*

| Potential mediator                                           | Odds ratio (95%CI)** in levels of mediator | Odds ratio (95%CI)** |                                                |                                       | Percentage mediated |
|--------------------------------------------------------------|--------------------------------------------|----------------------|------------------------------------------------|---------------------------------------|---------------------|
|                                                              |                                            | Total association    | Direct association through maternal SARS-CoV-2 | Indirect association through mediator |                     |
| Preterm birth                                                |                                            |                      |                                                |                                       |                     |
| Yes                                                          | 1.35 (0.97-1.90)                           | 1.35 (1.01-1.68)     | 1.04 (0.79-1.28)                               | 1.30 (1.18-1.42)                      | 89.3                |
| No                                                           | 0.80 (0.57-1.13)                           |                      |                                                |                                       |                     |
| Preterm birth or cesarean section                            |                                            |                      |                                                |                                       |                     |
| Yes                                                          | 1.33 (1.03-1.72)                           | 1.32 (1.02-1.62)     | 1.19 (0.93-1.45)                               | 1.11 (1.05-1.17)                      | 41.4                |
| No                                                           | 0.88 (0.57-1.37)                           |                      |                                                |                                       |                     |
| Preterm birth or cesarean section or Apgar score at 5 min <4 |                                            |                      |                                                |                                       |                     |
| Yes                                                          | 1.35 (1.05-1.75)                           | 1.32 (1.02-1.63)     | 1.19 (0.93-1.45)                               | 1.11 (1.05-1.18)                      | 42.0                |
| No                                                           | 0.82 (0.52-1.30)                           |                      |                                                |                                       |                     |

\*Respiratory distress syndrome, Transient tachypnea of the newborn, Meconium aspiration, or Pneumonia.

\*\*Odds ratio in infants to mothers with SARS-CoV-2 positivity (n=2 323) vs infants to mothers with no SARS-CoV-2 test-positivity (n=9 275). Each exposed infant was matched on maternal characteristics with up to four comparators.

**eTable 4.** Characteristics of Infants Born in Sweden (March 11, 2020 – Jan 31, 2021) and Testing Positive for SARS-CoV-2 in the Neonatal Period (0-28 Days After Birth)

| Test-positive infants to test-positive mothers | Gestational age, weeks | Admitted for Neonatal Care        | Apgar scores at 1, 5 and 10 min | Length of stay in neonatal care, days | Diagnoses in addition to Neonatal SARS-Cov-2 positivity                                                         | Procedures/interventions                                                                                       |
|------------------------------------------------|------------------------|-----------------------------------|---------------------------------|---------------------------------------|-----------------------------------------------------------------------------------------------------------------|----------------------------------------------------------------------------------------------------------------|
| Infant 1-12                                    | 35 to <42              | Never admitted                    | -                               | NA                                    | None reported in the Swedish Neonatal Quality Register                                                          | None reported in the Swedish Neonatal Quality Register                                                         |
| Infant 13                                      | 37                     | Admitted a) at birth and b) day 5 | 9, 10, 10                       | a) 2<br>b) 5                          | a) Exposure to MRSA (carrier) and SARS-CoV-2, isolation<br>b) Feeding difficulties                              | a) Monitoring of vital signs, screening                                                                        |
| Infant 14                                      | 39                     | Admitted at birth                 | 9, 9, 10                        | 6                                     | Clinical sepsis*                                                                                                | Chest X-ray (normal), tube feeding, antibiotics (7d)                                                           |
| Infant 15                                      | 40                     | Admitted at birth                 | 6, 9, 9                         | 4                                     | Transient tachypnea                                                                                             | CPAP (1 d), chest X-ray (normal), tube feeding                                                                 |
| Infant 16                                      | 39                     | Admitted at birth                 | 9, 9, 10                        | 4                                     | Transient tachypnea                                                                                             | CPAP (1d), chest X-ray (normal), bottle feeding                                                                |
| Infant 17                                      | 28                     | Admitted at birth                 | 5, 10, 10                       | 81                                    | Very preterm infant, small for gestational age, respiratory distress syndrome, patent ductus arteriosus, anemia | Mechanical ventilation (2d), CPAP (5d), parenteral nutrition, tube feeding, blood transfusion. No antibiotics. |
| Infant 18                                      | 34                     | Admitted at birth                 | 1, 4, 8                         | 4                                     | Preterm infant, mild asphyxia, hypoglycemia                                                                     | Ventilation at birth, tube feeding                                                                             |
| Infant 19                                      | 30                     | Admitted at birth                 | 2, 5, 7                         | 39                                    | Very preterm infant, mild asphyxia, respiratory distress syndrome,                                              | Mechanical ventilation (2d), CPAP (7d), parenteral nutrition, antibiotics (4d).                                |
| Infant 20                                      | 39                     | Admitted at birth                 | 9, 10, 10                       | 1                                     | Admission related to COVID-19, no other diagnosis reported                                                      | None reported in the Swedish Neonatal Quality Register                                                         |
| Infant 21                                      | 35                     | Admitted at birth                 | 9, 10, 10                       | 9                                     | Admission related to COVID-19, no other diagnosis reported                                                      | None reported in the Swedish Neonatal Quality Register                                                         |

**eTable 4 continued.** Characteristics of Infants Born in Sweden (March 11, 2020 – Jan 31, 2021) and Testing Positive for SARS-CoV-2 in the Neonatal Period (0-28 Days After Birth)

| Test-positive infants to non test-positive mothers | Gestational age, weeks | Admitted for Neonatal Care   | Apgar scores at 1, 5 and 10 min | Length of stay in neonatal care, days | Diagnoses in addition to Neonatal SARS-Cov-2 positivity                 | Procedures/interventions                                                       |
|----------------------------------------------------|------------------------|------------------------------|---------------------------------|---------------------------------------|-------------------------------------------------------------------------|--------------------------------------------------------------------------------|
| Infants 1-37                                       | 35 to <42              | Never admitted               | -                               | NA                                    | None reported in the Swedish Neonatal Quality Register                  | None reported in the Swedish Neonatal Quality Register                         |
| Infant 38                                          | 40                     | Admitted at birth            | 7, 8, 8                         | 35                                    | Paroxysmal supraventricular tachycardia (Wolf-Parkinson-White syndrome) | CPAP (2 d), chest X-ray (normal), tube feeding, ECG, pharmacological treatment |
| Infant 39                                          | 40                     | Admitted from home day 9     | 9, 10, 10                       | 4d                                    | Upper respiratory infection, feeding difficulties                       | Monitoring of vital signs                                                      |
| Infant 40                                          | 42                     | Admitted from home on day 23 | 9, 9, 10                        | 3d                                    | Admission related to COVID-19, no other diagnosis reported              | Monitoring of vital signs                                                      |
| Infant 41                                          | 39                     | Admitted at birth            | 3, 8, 10                        | 1d                                    | Mild asphyxia, transient tachypnea                                      | CPAP (1 d), chest X-ray (wet lung)                                             |
| Infant 41                                          | 39                     | Admitted from home day 15    | 9, 8, 10                        | 4d                                    | Fever, isolation                                                        | Monitoring of vital signs, antibiotics (1d)                                    |
| Infant 43                                          | 40                     | Admitted from home, day 21   | 9, 10, 10                       | 2d                                    | Unspecified condition                                                   | Antibiotics (2d)                                                               |
| Infant 44                                          | 41                     | Admitted at birth            | 9, 10, 10                       | 10d                                   | Transient tachypnea, patent ductus arteriosus, clinical sepsis*         | CPAP (1d), chest X-ray (normal), bottle feeding, antibiotics (5d)              |
| Infant 45                                          | 41                     | Admitted from home, day 12   | 8, 10, 10                       | 1d                                    | Fever                                                                   | Monitoring                                                                     |

**eTable 4 continued.** Characteristics of Infants Born in Sweden (March 11, 2020 – Jan 31, 2021) and Testing Positive for SARS-CoV-2 in the Neonatal Period (0-28 Days After Birth)

| Test-positive infants to <i>non test-positive</i> mothers, continued | Gestational age, weeks | Admitted for Neonatal Care          | Apgar scores at 1, 5 and 10 min | Length of stay in neonatal care, days | Diagnoses in addition to Neonatal SARS-Cov-2 positivity       | Procedures/interventions                                                    |
|----------------------------------------------------------------------|------------------------|-------------------------------------|---------------------------------|---------------------------------------|---------------------------------------------------------------|-----------------------------------------------------------------------------|
| Infant 46                                                            | 41                     | Admitted from maternity unit, day 2 | 9, 10, 10                       | 14d                                   | Cutaneous bleedings, transient thrombocytopenia (unspecified) | Thrombocyte transfusion, cranial ultrasonography, monitoring of vital signs |
| Infant 47                                                            | 32                     | Admitted at birth                   | 9, 10, 10                       | 16d                                   | Preterm twin                                                  | CPAP (1d), tube feeding, monitoring of vital signs                          |
| Infant 48                                                            | 32                     | Admitted at birth                   | 8, 9, 9                         | 16d                                   | Preterm twin                                                  | CPAP (1d), tube feeding, monitoring of vital signs                          |
| Infant 49                                                            | 37                     | Admitted from maternity unit, day 3 | 9, 10, 10                       | 2d                                    | Major malformation                                            | Extra Oxygen (1d), Antibiotics (3d)                                         |

CPAP = Continuous positive airway pressure, ECG=Electrocardiogram; MRSA = methicillin resistant staphylococcus aureus.

\*Clinical sepsis is defined in the Swedish Neonatal Quality Register as: clinical symptoms AND laboratory indications of infection AND intravenous antibiotic therapy for at least 5 days AND negative blood culture.

**eTable 5.** Neonatal Outcomes of Infants Born in Sweden (March 11, 2020 – Jan 31, 2021) by SARS-CoV-2 Test-Status of Mother in Pregnancy, Restricting the Exposure Window for test-Positivity Among Pregnant Women From Conception to Delivery

| Neonatal outcome                                                                   | SARS-CoV-2 test status              |                                                 | Odds ratio (95%CI) |
|------------------------------------------------------------------------------------|-------------------------------------|-------------------------------------------------|--------------------|
|                                                                                    | Infants to positive women (n=2 249) | Matched infants to non-positive women (n=8 983) |                    |
| <b>Resuscitation at birth</b>                                                      |                                     |                                                 |                    |
| Assisted ventilation (by mask or CPAP)                                             | 139 (6.2)                           | 457 (5.1)                                       | 1.24 (1.01-1.51)   |
| Intubated at birth                                                                 | 13 (0.6)                            | 28 (0.3)                                        | 1.86 (0.96-3.59)   |
|                                                                                    |                                     |                                                 |                    |
| <b>Admission to neonatal unit</b>                                                  | 251 (11.2)                          | 751 (8.4)                                       | 1.40 (1.20-1.63)   |
| Post-term infants ≥42 weeks of gestational age                                     | 6/39 (15.4)                         | 16/258 (6.2)                                    | -                  |
| Term (37-41 wks) or near-term (gestational age 35-36 wks) infants                  | 161/2 124 (7.6)                     | 568/8 552 (6.6)                                 | -                  |
| Preterm infants <35 weeks of gestational age                                       | 84/86 (97.7)                        | 167/173 (96.5)                                  | -                  |
| Very preterm infants <32 weeks of gestational age                                  | 34/34 (100)                         | 61/66 (92.4)                                    | -                  |
|                                                                                    |                                     |                                                 |                    |
| <b>Admission hypothermia (&lt;35.5°C), infants &lt;32 weeks of gestational age</b> | 4/34 (11.8)                         | 5/66 (7.6)                                      | 1.43 (1.10-1.85)   |
|                                                                                    |                                     |                                                 |                    |
| <b>Neurologic disorders</b>                                                        |                                     |                                                 |                    |
| Hypoxic-ischemic encephalopathy 2-3                                                | 3 (0.1)                             | 7 (0.1)                                         | 1.71 (0.44-6.63)   |
| Neonatal convulsions                                                               | 6 (0.3)                             | 14 (0.2)                                        | 1.71 (0.66-4.46)   |
| Severe brain injury (IVH3-4 or cPVL) in infants <32 weeks of gestational age       | 1/34 (2.9)                          | 4/66 (6.1)                                      | -                  |
|                                                                                    |                                     |                                                 |                    |
| <b>Respiratory disorders and treatments</b>                                        |                                     |                                                 |                    |
| Respiratory distress syndrome                                                      | 28 (1.2)                            | 50 (0.6)                                        | 2.32 (1.44-3.73)   |
| Transient tachypnea of the newborn                                                 | 30 (1.3)                            | 117 (1.3)                                       | 1.03 (0.68-1.54)   |
| Meconium aspiration                                                                | 3 (0.1)                             | 13 (0.1)                                        | 0.92 (0.26-3.24)   |
| CPAP                                                                               | 106 (4.7)                           | 343 (3.8)                                       | 1.25 (1.00-1.57)   |
| CPAP, duration in days                                                             |                                     |                                                 |                    |
| Median (IQR)                                                                       | 2 (1-4)                             | 2 (1-2)                                         |                    |
| Range, min-max                                                                     | 1-78                                | 1-101                                           |                    |
| Mechanical ventilation                                                             | 21 (0.9)                            | 46 (0.5)                                        | 1.86 (1.10-3.14)   |
| Mechanical ventilation, duration in days                                           |                                     |                                                 |                    |
| Median (IQR)                                                                       | 7 (3-8)                             | 4 (2-8)                                         |                    |
| Range, min-max                                                                     | 1-23                                | 1-70                                            |                    |

Data are no. (%) if not stated otherwise.



**eTable 5 continued.** Neonatal Outcomes of Infants Born in Sweden (March 11, 2020 – Jan 31, 2021) by SARS-CoV-2 Test-Status of Mother in Pregnancy, Restricting the Exposure Window for test-Positivity Among Pregnant Women From Conception to Delivery

| Neonatal outcome                                                                                  | SARS-CoV-2 test status              |                                                 | Odds ratio (95%CI) |
|---------------------------------------------------------------------------------------------------|-------------------------------------|-------------------------------------------------|--------------------|
|                                                                                                   | Infants to positive women (n=2 249) | Matched infants to non-positive women (n=8 983) |                    |
| Surfactant administration in infants <32 weeks of gestational age                                 | 14/34 (41.2)                        | 28/66 (42.4)                                    | -                  |
| Number of surfactant administrations                                                              |                                     |                                                 |                    |
| Median (IQR)                                                                                      | 1 (1-1)                             | 1 (1-2)                                         |                    |
| Range, min-max                                                                                    | 1-4                                 | 1-4                                             |                    |
| Postnatal corticosteroids (any systemic) for lung disease in infants <32 weeks of gestational age | 2/34 (5.9)                          | 7/66 (10.6)                                     | -                  |
| Need of extra oxygen at 28 days of postnatal age in Infants <32 weeks of gestational age          | 0/34 (0)                            | 3/66 (4.5)                                      | -                  |
| Any respiratory disorder (RDS, TTN, MAS or pneumonia*)                                            | 61 (2.7)                            | 184 (2.0)                                       | 1.34 (1.00-1.80)   |
| <b>Circulatory problems</b>                                                                       |                                     |                                                 |                    |
| Persistent pulmonary hypertension                                                                 | 4 (0.2)                             | 8 (0.1)                                         | 2.00 (0.60-6.64)   |
| Patent ductus arteriosus in infants <32 weeks of gestational age                                  | 3/34 (8.8)                          | 8/66 (12.1)                                     | -                  |
| <b>Infections</b>                                                                                 |                                     |                                                 |                    |
| Pneumonia*                                                                                        | 3 (0.1)                             | 8 (0.1)                                         | 1.50 (0.40-5.65)   |
| Sepsis (verified by blood-culture)                                                                | 4 (0.2)                             | 7 (0.1)                                         | 2.29 (0.67-7.81)   |
| Antibiotic therapy                                                                                | 61 (2.7)                            | 186 (2.1)                                       | 1.33 (0.99-1.78)   |
| <b>Metabolic or hematologic problems</b>                                                          |                                     |                                                 |                    |
| Hypoglycemia                                                                                      | 49 (2.2)                            | 180 (2.0)                                       | 1.09 (0.79-1.51)   |
| Treated hyperbilirubinemia                                                                        | 81 (3.6)                            | 224 (2.5)                                       | 1.48 (1.14-1.92)   |
| Blood transfusion                                                                                 | 17 (0.8)                            | 43 (0.5)                                        | 1.60 (0.90-2.84)   |
| <b>Gastrointestinal disorder</b>                                                                  |                                     |                                                 |                    |
| Surgery for necrotizing enterocolitis in infants <32 weeks of gestational age                     | 0/34 (0)                            | 2/66 (3.0)                                      | -                  |
| <b>In-hospital mortality</b>                                                                      |                                     |                                                 |                    |
| Overall                                                                                           | 6 (0.27)                            | 11 (0.12)                                       | 2.18 (0.81-5.90)   |
| Gestational age <32 weeks                                                                         | 3/34 (8.8)                          | 8/66 (12.1)                                     | -                  |

Data are no. (%) if not stated otherwise.

**eTable 5 continued.** Neonatal Outcomes of Infants Born in Sweden (March 11, 2020 – Jan 31, 2021) by SARS-CoV-2 Test-Status of Mother in Pregnancy, Restricting the Exposure Window for test-Positivity Among Pregnant Women From Conception to Delivery

| Neonatal outcome                                                               | SARS-CoV-2 test status              |                                                 | Odds ratio (95%CI) |
|--------------------------------------------------------------------------------|-------------------------------------|-------------------------------------------------|--------------------|
|                                                                                | Infants to positive women (n=2 249) | Matched infants to non-positive women (n=8 983) |                    |
| <b>Length of hospital stay in infants not admitted for neonatal care, days</b> |                                     |                                                 |                    |
| Median (IQR)                                                                   | 2 (1-3)                             | 2 (1-2)                                         |                    |
| Range, min-max                                                                 | 0-24                                | 0-19                                            |                    |
| Missing – no. (%)                                                              | 181 (8.0)                           | 235 (2.6)                                       |                    |
| <b>Length of hospital stay in infants admitted for neonatal care, days</b>     |                                     |                                                 |                    |
| Median (IQR)                                                                   | 3 (0-10)                            | 5 (2-10)                                        |                    |
| Range, min-max                                                                 | 0-107                               | 0-119                                           |                    |
| <b>Breastfeeding at discharge</b>                                              |                                     |                                                 |                    |
| Yes                                                                            | 1 827/1 933 (94.5)                  | 7 635/8 027 (95.1)                              | 0.84 (0.67-1.06)   |
| No                                                                             | 106/1 933 (5.5)                     | 392/8 027 (4.9)                                 | 1.19 (0.94-1.50)   |
| Missing                                                                        | 316                                 | 956                                             |                    |
| <b>Positive SARS-CoV-2 test in infant</b>                                      |                                     |                                                 |                    |
| <i>Reported to SmiNet</i>                                                      |                                     |                                                 |                    |
| Early neonatal (0-6d)                                                          | 12 (0.5)                            | 0                                               |                    |
| Late neonatal (7-28d)                                                          | 2 (0.1)                             | 4 (0.0)                                         |                    |
| Post neonatal (>28d)                                                           | 0                                   | 25 (0.3)                                        |                    |
| At any postnatal age                                                           | 14 (0.6)                            | 29 (0.3)                                        |                    |

Data are no. (%) if not stated otherwise.

\*No infant with pneumonia tested positive for SARS-CoV-2.

CPAP= continuous positive airway pressure; cPVL= cystic periventricular leukomalacia; IQR= Interquartile range; IVH3-4= intraventricular hemorrhage grade 3 or 4; MAS=meconium aspiration syndrome; RDS=respiratory distress syndrome; SmiNet= Swedish Register for Communicable Diseases; TTN=transient tachypnea of the newborn; 95%CI= 95% confidence interval.
